# Supplementary material for: A fluorescent aptasensor based on copper nanoclusters for optical detection of CD44 exon v10, an important isoform in metastatic breast cancer
Source: Royal Society of Chemistry journal article supplement (doi:10.1039/d1ay01087e), 2021-01-01
Supplement: d1ay01087e1.pdf [file d1ay01087e1.pdf]

## Supplementary

### Figure legend

**Fig. S1** (a) UV-Vis spectrum of Apt-CuNCs, (b) A TEM image of Apt-CuNCs dispersed on a copper grid.

**Fig. S2** (a) UV-Vis spectrum of Apt-AuNCs, (b) A TEM image of Apt-AuNCs dispersed on a copper grid. Nanoparticles showed by arrows.

**Fig. S3** (a) Synthesis of Apt-AgNCs in different buffers, (b) UV-Vis spectrum of Apt-AgNCs prepared in Na-phosphate buffer, (c) A TEM image of Apt-AgNCs dispersed on a copper grid.

### Table legend

**Table S1** CD44 *v10* specific aptamers (native & modified) used for synthesis of Apt-nanoclusters

## Supplemantry Data

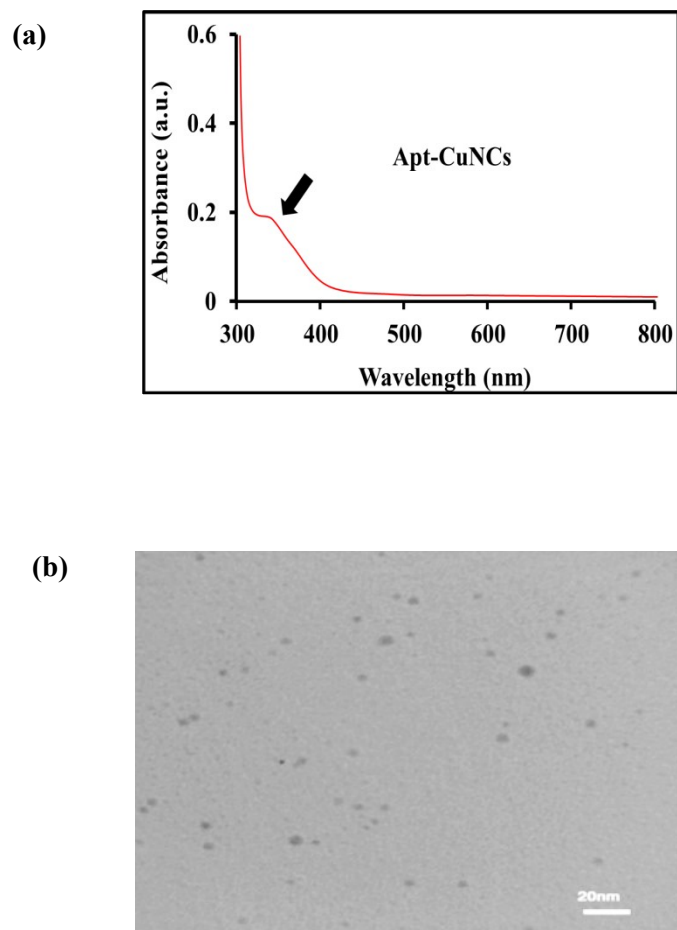

**Fig. S1** (a) UV-Vis spectrum of Apt-CuNCs, (b) A TEM image of Apt-CuNCs dispersed on a copper grid.

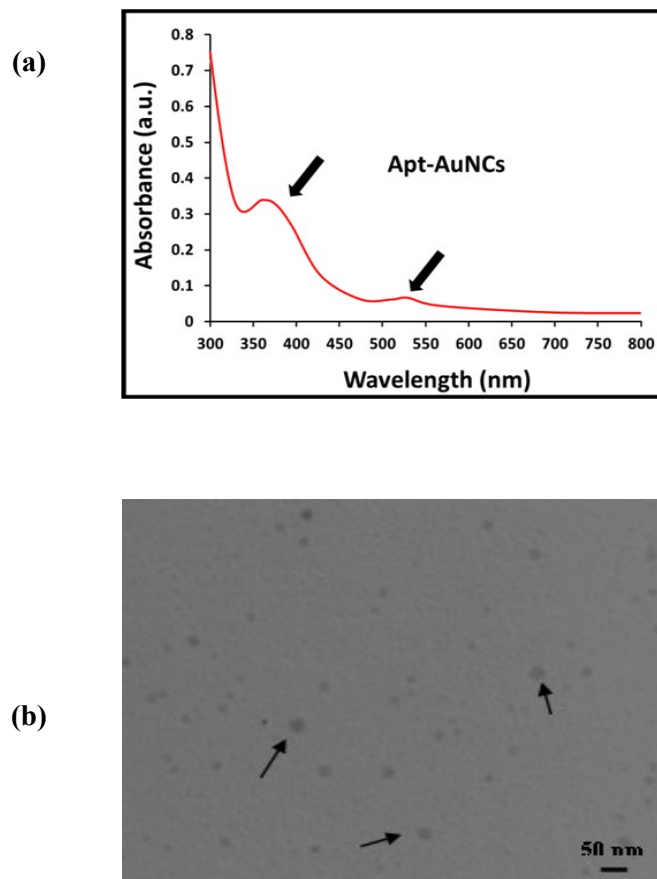

**Fig. S2** (a) UV-Vis spectrum of Apt-AuNCs, (b) A TEM image of Apt-AuNCs dispersed on a copper grid. Nanoparticles showed by arrows.

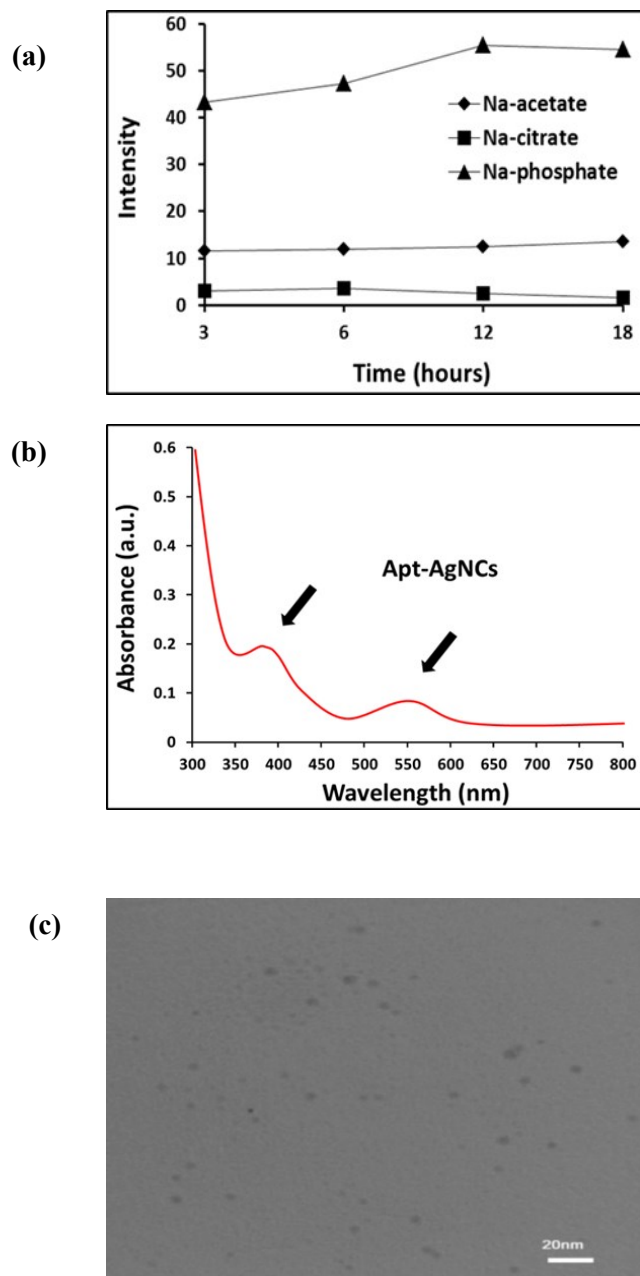

**Fig. S3** (a) Synthesis of Apt-AgNCs in different buffers, (b) UV-Vis spectrum of Apt-AgNCs prepared in Na-phosphate buffer, (c) A TEM image of Apt-AgNCs dispersed on a copper grid.

---

| Name   | Type     | Sequence                                   |
|--------|----------|--------------------------------------------|
| Apt7   | native   | 5'- CCGCGAACCCCCCCCCTTAATGTCA -3'          |
| M-Apt7 | modified | 5' - (T12)AAACCGCGAACCCCCCCCCTTAATGTCA -3' |
| Apt4   | native   | 5'- CTCCCAGCCCCTCACGTCAGCCCGC -3'          |
| M-Apt4 | modified | 5'- (T12)AAACTCCCAGCCCCTCACGTCAGCCCGC -3'  |

---
